# Supplementary material for: New Glycosalen–Manganese(III) Complexes and RCA120 Hybrid Systems as Superoxide Dismutase/Catalase Mimetics
Source: MDPI journal article supplement (doi:10.3390/biomimetics8050447), 2023-09-21
Supplement: s1 [file s1]

# **New Glycosalen– Manganese(III) Complexes and RCA<sub>120</sub> Hybrid Systems as Superoxide Dismutase/Catalase Mimetics**

<sup>1</sup> Istituto di Cristallografia, Consiglio Nazionale delle Ricerche, Via Gaifami 18, 95125 Catania, Italy; [valeria.lanza@cnr.it](mailto:valeria.lanza@cnr.it)

<sup>2</sup> Dipartimento di Scienze Chimiche, Università di Catania, Viale A. Doria 6, 95125 Catania, Italy

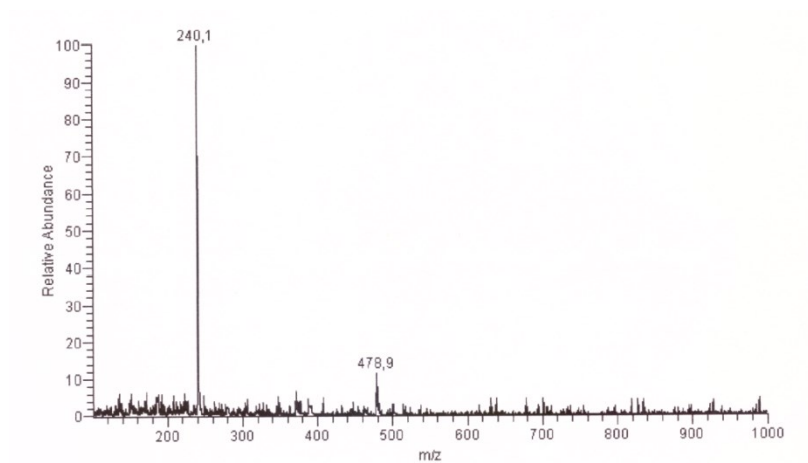

Figure S1. ESI-MS spectrum of **1a**

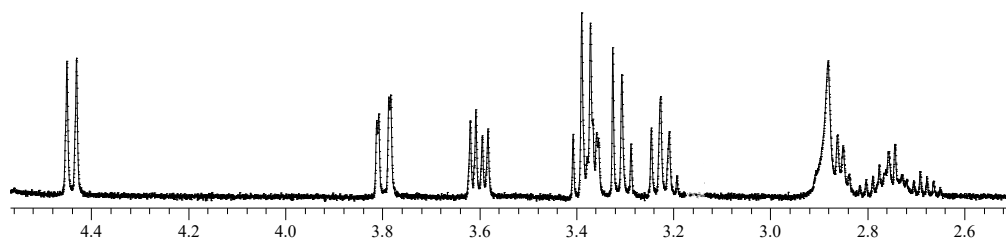

Figure S2. <sup>1</sup>H NMR spectrum of **1a** (D<sub>2</sub>O, 500 MHz)

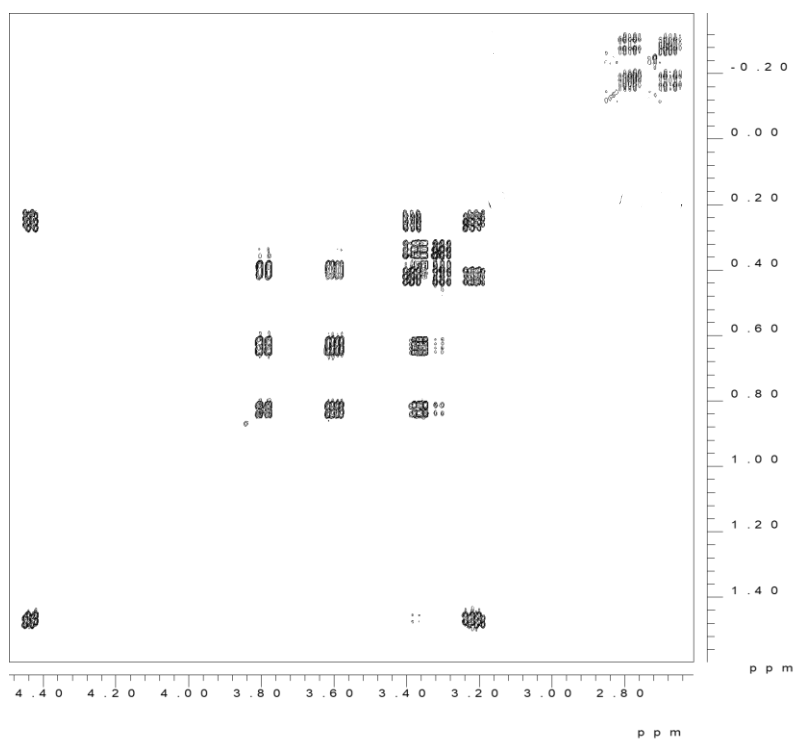

Figure S3.  $^1\text{H}$  NMR COSY spectrum of **1a** ( $\text{D}_2\text{O}$ , 500 MHz)

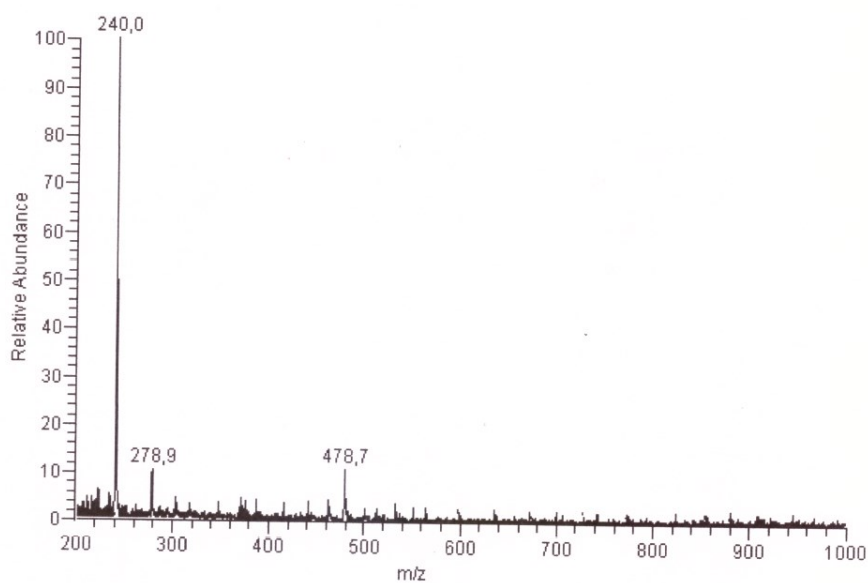

Figure S4. ESI-MS of **1b**

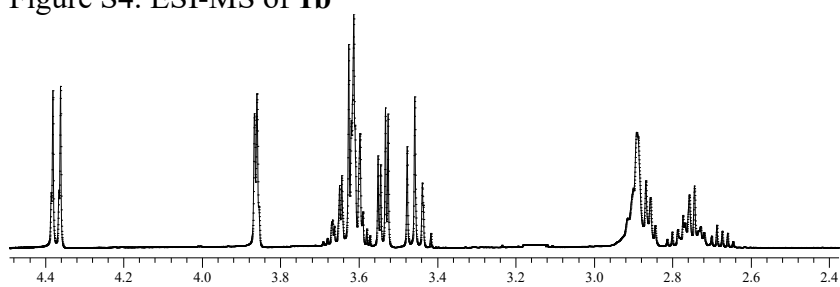

Figure S5.  $^1\text{H}$  NMR spectrum of **1b** ( $\text{D}_2\text{O}$ , 500 MHz)

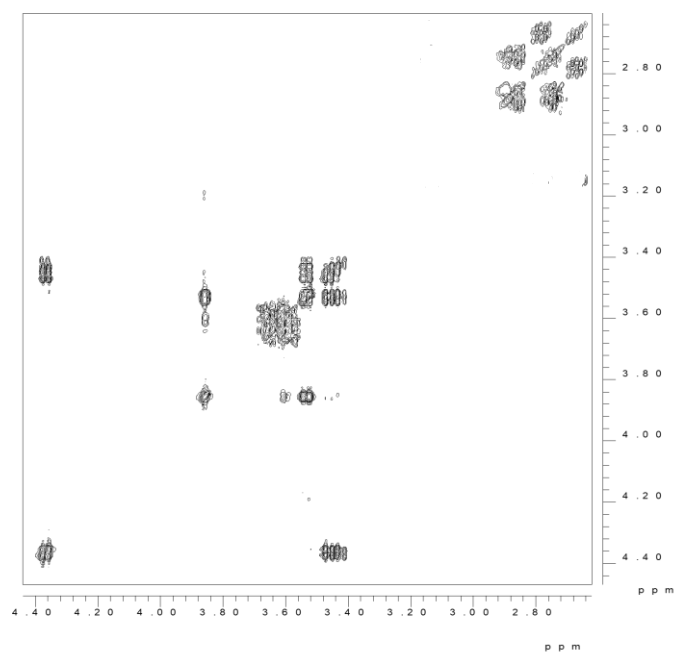

Figure S6.  $^1\text{H}$  NMR COSY spectrum of **1b** ( $\text{D}_2\text{O}$ , 500 MHz)

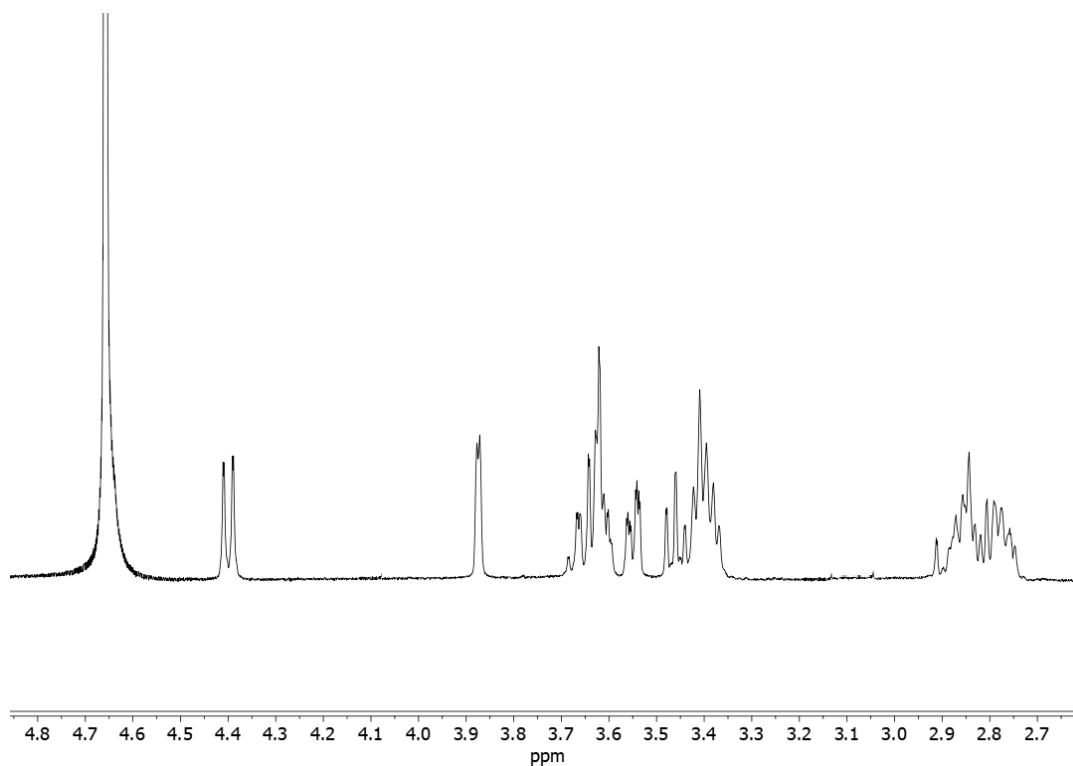

Figure S7.  $^1\text{H}$  NMR spectrum of **2b** ( $\text{D}_2\text{O}$ , 500 MHz)

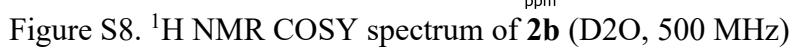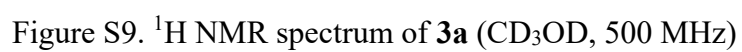

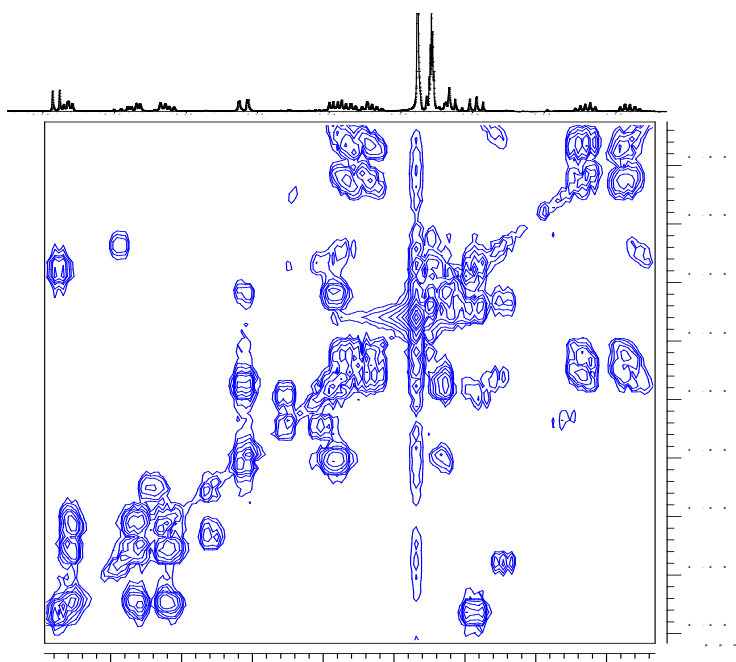

Figure S10.  $^1\text{H}$  NMR COSY spectrum of **3a** ( $\text{CD}_3\text{OD}$ , 500 MHz)

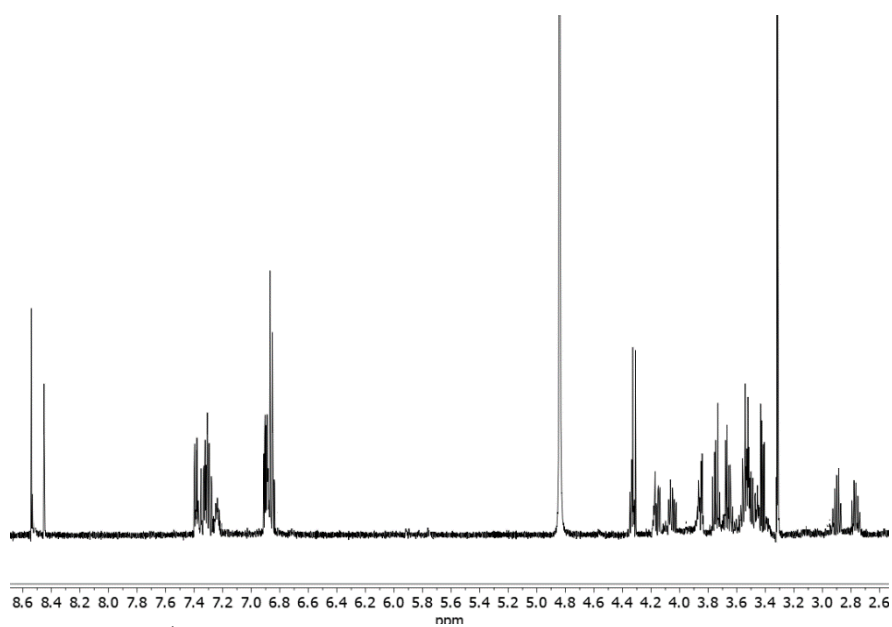

Figure S11.  $^1\text{H}$  NMR spectrum of **3b** ( $\text{CD}_3\text{OD}$ , 500 MHz)

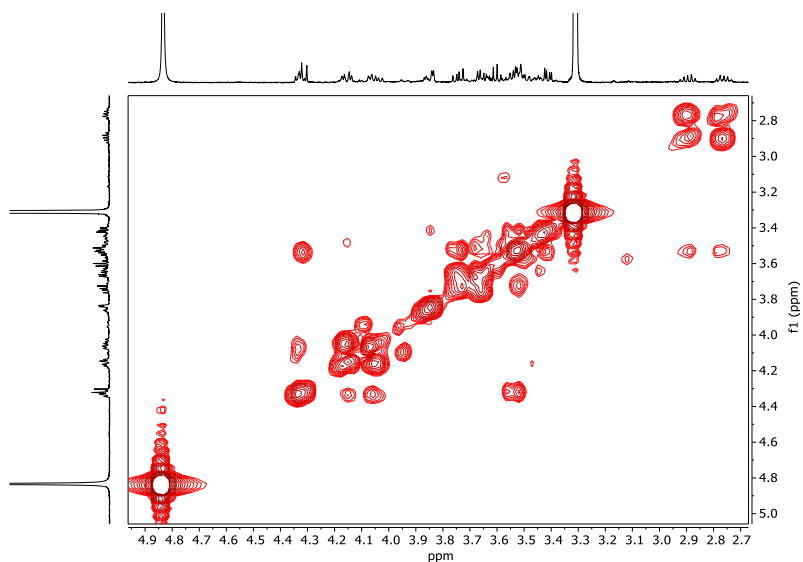

Figure S12.  $^1\text{H}$  NMR COSY spectrum of **3b** ( $\text{CD}_3\text{OD}$ , 500 MHz)

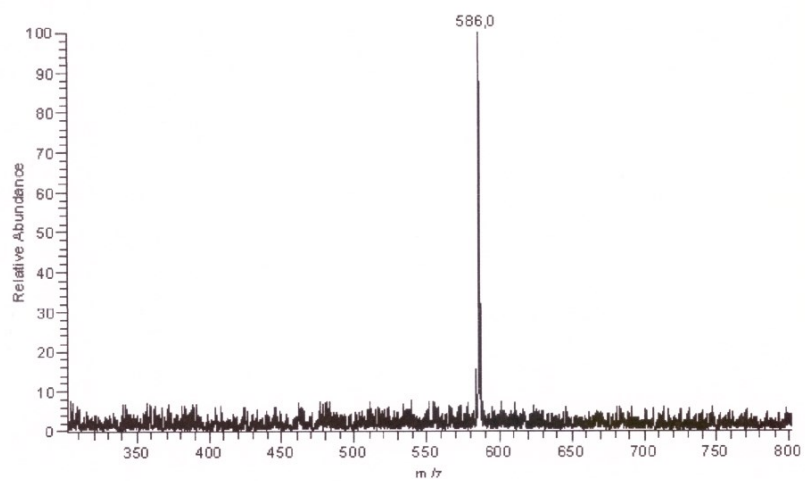

Figure S13. ESI-MS of **4b**

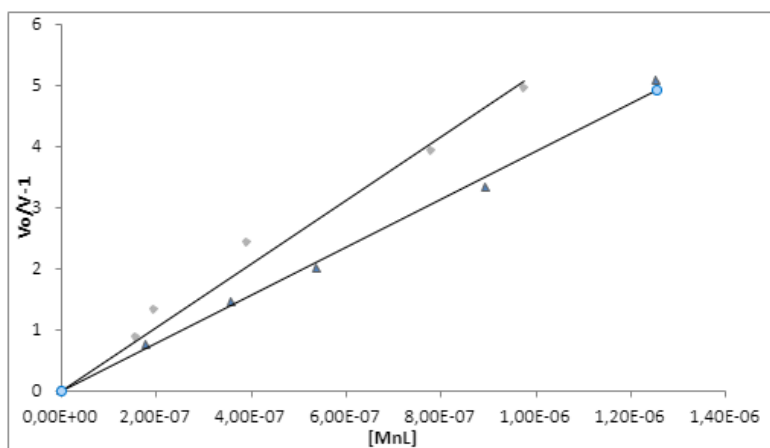

Figure S14. SOD like activity of **4a** (diamond) and **4b** (triangle) (Fridovich assay).

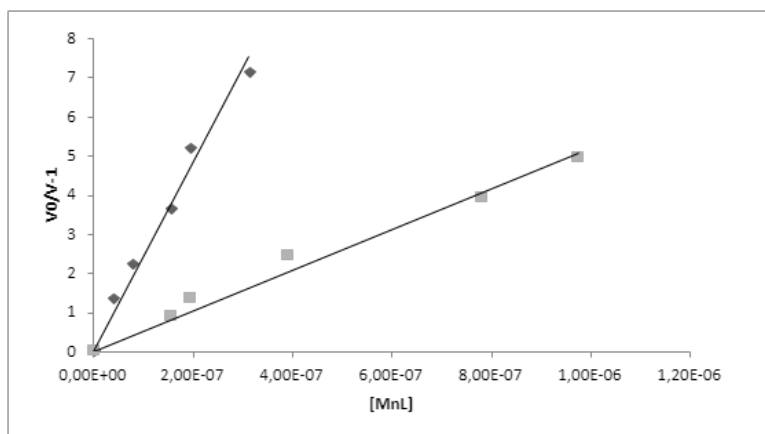

Figure S15. Comparison between SOD-like activity of **4a** alone (gray squares) and after incubation with RCA<sub>120</sub> (black squares).

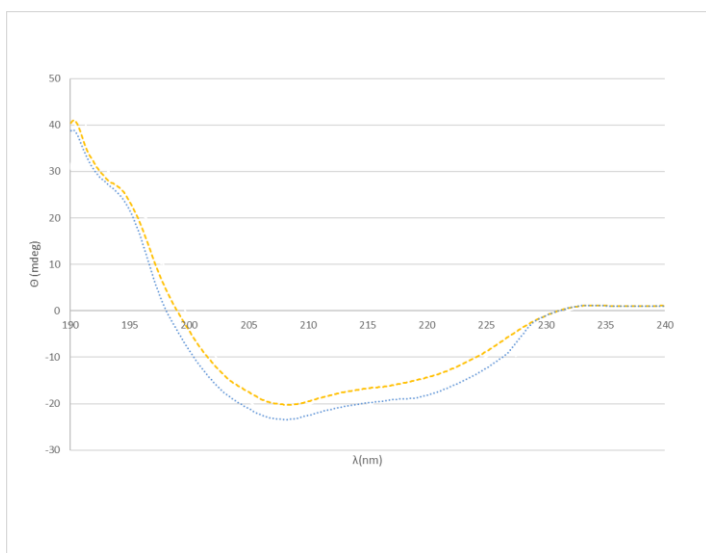

Figure S16. CD spectra of RCA<sub>120</sub> alone ( $1.6 \times 10^{-4}$  M) (blue) and in the presence of **4a** ( $3.2 \times 10^{-4}$  M) (yellow).



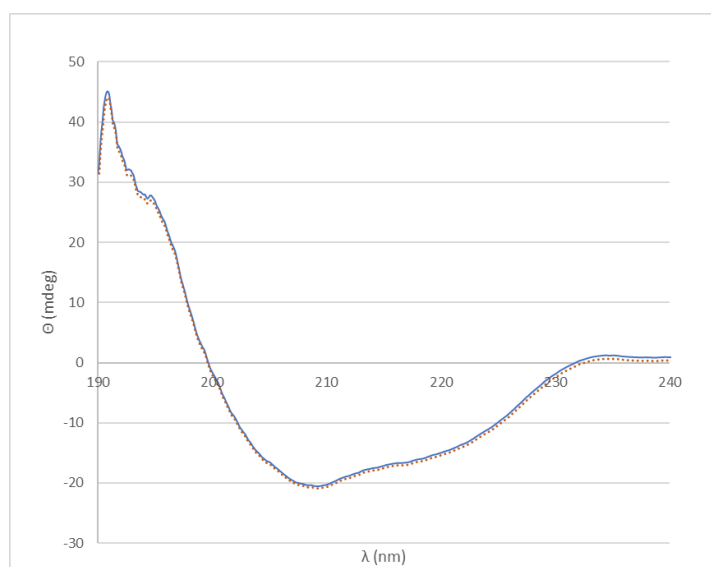

Figure S17. CD spectra of RCA<sub>120</sub> alone (1.6x10<sup>-4</sup> M) (blue) and in the presence of **4b** (3.2x10<sup>-4</sup> M) (red).
